# Supplementary material for: Psychosocial factors at work and inflammatory markers: protocol for a systematic review and meta-analysis
Source: PubMed Central journal article supplement — BMJ Open. 2018 Aug 29;8(8):e022612. doi: 10.1136/bmjopen-2018-022612 (PMC6119426; doi:10.1136/bmjopen-2018-022612), 2018-08-29
Supplement: bmjopen-2018-022612supp001.pdf [file bmjopen-2018-022612supp001.pdf]

## Appendix 1. Search terms used for the electronic databases

| Database | Search terms                                                                                                                                                                                                                                                                                                                                                                                                                                                                                                                                                                                                                                                                                                                                                                                                                                                                                                                                                                                                                                                                                                                                                                                                                                                                                                                                                                                                                                                                                                                                                                                                                                                                                                                                                                                                                                                                                                                                                                                                                                                                                                                                                                                                                                                                                                                                                                                                                                                                                                                                                                                                                                                                                                                                                                                                                                                                                                                                                                                                                                                                                                                                                                                                                                                                                                                                                                                                                                        |
|----------|-----------------------------------------------------------------------------------------------------------------------------------------------------------------------------------------------------------------------------------------------------------------------------------------------------------------------------------------------------------------------------------------------------------------------------------------------------------------------------------------------------------------------------------------------------------------------------------------------------------------------------------------------------------------------------------------------------------------------------------------------------------------------------------------------------------------------------------------------------------------------------------------------------------------------------------------------------------------------------------------------------------------------------------------------------------------------------------------------------------------------------------------------------------------------------------------------------------------------------------------------------------------------------------------------------------------------------------------------------------------------------------------------------------------------------------------------------------------------------------------------------------------------------------------------------------------------------------------------------------------------------------------------------------------------------------------------------------------------------------------------------------------------------------------------------------------------------------------------------------------------------------------------------------------------------------------------------------------------------------------------------------------------------------------------------------------------------------------------------------------------------------------------------------------------------------------------------------------------------------------------------------------------------------------------------------------------------------------------------------------------------------------------------------------------------------------------------------------------------------------------------------------------------------------------------------------------------------------------------------------------------------------------------------------------------------------------------------------------------------------------------------------------------------------------------------------------------------------------------------------------------------------------------------------------------------------------------------------------------------------------------------------------------------------------------------------------------------------------------------------------------------------------------------------------------------------------------------------------------------------------------------------------------------------------------------------------------------------------------------------------------------------------------------------------------------------------------|
| PubMed   | <p>(employe*[tw] OR manag*[tw] OR colleague*[tw] OR worksit*[tw] OR “work”[tw] OR works*[tw] OR work’*[tw] OR worka*[tw] OR worke*[tw] OR workg*[tw] OR worki*[tw] OR workl*[tw] OR workp*[tw] OR occupant*[tw] OR company*[tw] OR offic*[tw] OR busines*[tw] OR workplace[mh]) AND</p> <p>(("Stress, Mechanical"[Mesh] OR "Lifting"[Mesh] OR "Moving and Lifting Patients"[Mesh] OR "Weight-Bearing"[Mesh] OR "Biomechanics" OR “Physical Exertion"[Mesh] OR "Torsion, Mechanical"[Mesh] OR "Postural Balance"[Mesh] OR "Walking"[Mesh] OR "Recovery of Function"[Mesh] OR "Relaxation"[Mesh] OR (static[Title/Abstract] AND posture) OR (awkward[Title/Abstract] AND posture) OR (dynamic[Title/Abstract] AND posture) OR static work[Title/Abstract] OR dynamic load*[Title/Abstract] OR lift*[Title/Abstract] OR carry*[Title/Abstract] OR hold*[Title/Abstract] OR pull*[Title/Abstract] OR drag*[Title/Abstract] OR push*[Title/Abstract] OR manual handling[Title/Abstract] OR force*[Title/Abstract] OR biomechanic*[Title/Abstract] OR walking*[Title/Abstract] OR postural balance[Title/Abstract] OR flexion*[Title/Abstract] OR extension*[Title/Abstract] OR turning[Title/Abstract] OR sitting[Title/Abstract] OR kneeling[Title/Abstract] OR squatting[Title/Abstract] OR twisting[Title/Abstract] OR bending[Title/Abstract] OR reaching[Title/Abstract] OR standing[Title/Abstract] OR sedentary[Title/Abstract] OR repetitive movement*[Title/Abstract] OR monotonous work[Title/Abstract] OR relaxation[Title/Abstract] OR recovery of function[Title/Abstract] OR physical demand*[Title/Abstract] OR physically demand*[Title/Abstract]) OR ("Stress, Psychological"[Majr] OR "Social Support"[Majr] OR "Job Satisfaction"[Mesh] OR "Work Schedule Tolerance"[Mesh] OR "Employee Performance Appraisal"[Mesh] OR "Employee Grievances"[Mesh] OR "Social Justice/psychology"[Mesh] OR "Personnel Downsizing"[Mesh] OR "Staff Development"[Mesh] OR "Organizational Culture"[Mesh] OR "Bullying"[Mesh] OR "Prejudice"[Mesh] OR "Social Discrimination"[Mesh] OR "Interpersonal Relations"[Mesh] OR "Communication/psychology"[Mesh]) OR (psychosocial[Title/Abstract] OR job strain[Title/Abstract] OR work strain[Title/Abstract] OR work demand*[Title/Abstract] OR job demand*[Title/Abstract] OR high demand*[Title/Abstract] OR low control[Title/Abstract] OR lack of control[Title/Abstract] OR work control[Title/Abstract] OR job control[Title/Abstract] OR decision latitude[Title/Abstract] OR work influence*[Title/Abstract] OR demand resource*[Title/Abstract] OR effort reward*[Title/Abstract] OR time pressure*[Title/Abstract] OR recuperation*[Title/Abstract] OR work overload*[Title/Abstract] OR work over-load*[Title/Abstract] OR recovery[Title/Abstract] OR coping[Title/Abstract] OR work ability[Title/Abstract] OR social support[Title/Abstract] OR support system*[Title/Abstract] OR social network*[Title/Abstract] OR emotional support[Title/Abstract] OR interpersonal relation*[Title/Abstract] OR interaction*[Title/Abstract] OR social capital [Title/Abstract] OR justice*[Title/Abstract] OR injustice*[Title/Abstract] OR job satisfaction[Title/Abstract] OR work satisfaction[Title/Abstract] OR boredom[Title/Abstract] OR skill discretion*[Title/Abstract] OR staff development[Title/Abstract] OR discrimination[Title/Abstract] OR harass*[Title/Abstract] OR work-place</p> |

---

conflict\*[Title/Abstract] OR workplace violen\*[Title/Abstract] OR work-place violen\*[Title/Abstract] OR bullying[Title/Abstract] OR ageism[Title/Abstract] OR homophobia[Title/Abstract] OR racism[Title/Abstract] OR sexism[Title/Abstract] OR victimization\*[Title/Abstract] OR silent workplace\*[Title/Abstract] OR role ambiguity[Title/Abstract] OR role-conflict\*[Title/Abstract] OR work-role\*[Title/Abstract] OR working hour\*[Title/Abstract] OR working time[Title/Abstract] OR day-time[Title/Abstract] OR night-time[Title/Abstract] OR shift work\*[Title/Abstract] OR work shift\*[Title/Abstract] OR temporary work[Title/Abstract] OR full-time[Title/Abstract] OR part-time[Title/Abstract] OR flexible work\*[Title/Abstract] OR organizational change[Title/Abstract] OR organisational change[Title/Abstract] OR lean production[Title/Abstract] OR job security[Title/Abstract] OR job insecurity[Title/Abstract])) AND  
 ("inflammation"[MeSH Terms] OR inflammation\*[All Fields]) OR ("immune system"[MeSH Terms] OR "immune system phenomena"[MeSH Terms] OR "immunity"[All Fields] OR "immunology"[All Fields]) OR ("c-reactive protein"[MeSH Terms] OR ("c-reactive"[All Fields] AND protein[All Fields]) OR c-reactive protein[All Fields] OR CRP[All Fields]) OR ("cytokines"[MeSH Terms] OR cytokine\*[All Fields]) OR ("lymphokines"[MeSH Terms] OR lymphokine\*[All Fields]) OR ("chemokines"[MeSH Terms] OR chemokine\*[All Fields]) OR ("monokines"[MeSH Terms] OR monokine\*[All Fields]) OR ("tumor necrosis factor-alpha"[MeSH Terms] OR tumor necrosis factor\*[All Fields] OR ("tumor"[All Fields] AND "necrosis"[All Fields] AND factor\*[All Fields]) OR TNF\*[All Fields]) OR ("interleukins"[MeSH Terms] OR interleukin\*[All Fields] OR IL[All Fields])) AND  
 ((longitudinal stud\*) OR (prospective cohort stud\*) OR (prospective stud\*) OR (follow-up stud\*) OR (observational stud\*) OR (case-control stud\*) OR (cohort stud\*) OR (epidemiologic stud\*) OR (cohort analy\*) OR (observ\* stud\*) OR (retrospective stud\*))  
 (employe\* OR manag\* OR colleague\* OR worksit\* OR "work" OR works\* OR work\* OR worka\* OR worke\* OR workg\* OR worki\* OR workl\* OR workp\* OR occupant\* OR company\* OR offic\* OR busines\* OR workplace) AND  
 ("Stress, Mechanical" OR "Lifting" OR "Moving and Lifting Patients" OR "Weight-Bearing" OR "Biomechanics" OR "Physical Exertion" OR "Torsion, Mechanical" OR "Postural Balance" OR "Walking" OR "Recovery of Function" OR "Relaxation" OR (static AND posture) OR (awkward AND posture) OR (dynamic AND posture) OR (static AND work) OR (dynamic AND load\*) OR lift\* OR carry\* OR hold\* OR pull\* OR drag\* OR push\* OR (manual AND handling) OR force\* OR biomechanic\* OR walking\* OR (postural AND balance) OR flexion\* OR extension\* OR turning OR sitting OR kneeling OR squatting OR twisting OR bending OR reaching OR standing OR sedentary OR (repetitive AND movement\*) OR (monotonous AND work) OR relaxation OR (recovery AND of AND function) OR (physical AND demand\*) OR (physically AND demand\*)) OR ("Stress, Psychological"/exp OR "Stress, Psychological" OR "Social Support"/exp OR "Social Support" OR "Job Satisfaction"/exp OR "Job Satisfaction" OR "Work Schedule Tolerance"/exp OR "Work Schedule Tolerance" OR "Employee Performance Appraisal"/exp OR "Employee Performance Appraisal" OR "Employee Grievances"/exp OR "Employee Grievances" OR "Social Justice/psychology" OR "Personnel Downsizing"/exp OR "Personnel Downsizing" OR "Staff Development"/exp OR "Staff Development" OR "Organizational Culture"/exp OR "Organizational Culture" OR "Bullying"/exp OR "Bullying" OR "Prejudice"/exp OR "Prejudice"/exp OR "Prejudice" OR "Social Discrimination"/exp OR "Social Discrimination" OR "Interpersonal Relations"/exp OR "Interpersonal Relations" OR "Communication/psychology") OR (psychosocial OR (job AND strain) OR (work AND strain) OR (work AND demand\*) OR (job AND demand\*) OR (high AND demand\*) OR (low AND control) OR (lack AND of AND control)

---

EMBASE,  
 PsycINFO/  
 PsycARTICLES  
 , Web of Science

---

OR (work AND control) OR (job AND control) OR (decision AND latitude) OR (work AND influence\*) OR (demand AND resource\*) OR (effort AND reward\*) OR (time AND pressure\*) OR recuperation\* OR (work AND overload\*) OR (work AND over-load\*) OR recovery OR coping OR (work AND ability) OR (social AND support) OR (support AND system\*) OR (social AND network\*) OR (emotional AND support) OR (interpersonal AND relation\*) OR interaction\* OR (social AND capital) OR justice\* OR injustice\* OR (job AND satisfaction) OR (work AND satisfaction) OR boredom OR (skill AND discretion\*) OR (staff AND development) OR discrimination OR harass\* OR (work-place AND conflict\*) OR (workplace AND violen\*) OR (workplace AND violen\*) OR bullying OR ageism OR homophobia OR racism OR sexism OR victimization\* OR (silent AND workplace\*) OR (role AND ambiguity) OR role-conflict\* OR work-role\* OR (working AND hour\*) OR (working AND time) OR day-time OR night-time OR (shift AND work\*) OR (work AND shift\*) OR (temporary AND work) OR full-time OR part-time OR (flexible AND work\*) OR (organizational AND change) OR (organizational AND change) OR (lean AND production) OR (job AND security) OR (job AND insecurity))) AND  
(((("inflammation" OR inflammation\*) OR ("immune system" OR "immune system phenomena" OR "immunity" OR "immunology")) OR ("c-reactive protein" OR ("c-reactive" AND protein) OR c-reactive protein OR CRP) OR ("cytokines" OR cytokine\*) OR ("lymphokines" OR lymphokine\*) OR ("chemokines" OR chemokine\*) OR ("monokines" OR monokine\*) OR ("tumor necrosis factor-alpha" OR tumor necrosis factor\* OR ("tumor" AND "necrosis" AND factor\*) OR TNF\*) OR ("interleukins" OR interleukin\* OR IL)) AND  
(longitudinal stud\*) OR (prospective cohort stud\*) OR (prospective stud\*) OR (follow-up stud\*) OR (observational stud\*) OR (case-control stud\*) OR (cohort stud\*) OR (epidemiologic stud\*) OR (cohort analy\*) OR (observ\* stud\*) OR (retrospective stud\*)

Japan Medical  
Abstracts  
Society

(労働 OR 従業員 OR 社員 OR ワークサンプル OR 同僚 OR 仲間 OR 上司 OR 管理 OR 監督 OR マネージャー OR マネジャー OR 課長 OR 部長 OR 主任 OR 上長 OR 役員 OR チーフ OR リーダー OR 上役 OR 雇い主 OR 雇主 OR 雇用 OR ワークグループ OR 仕事 OR ワーク OR 作業 OR 就労 OR 勤務 OR ワーキング OR 働く OR 職場 OR オフィス OR 研究所 OR 診療所 OR 医院 OR 事業 OR 職業 OR 家業 OR 事務 OR 業務 OR 執務 OR 営業 OR 所業 OR 実業 OR 産業 OR 就業 OR 企業 OR 会社 OR 商会 OR 法人) AND  
(機械的ストレス OR 持ちあげ OR 患者の移動 OR 患者の持ち上げ OR 荷重負荷 OR 体重負荷 OR 生物力学 OR 労作 OR 機械的ねじれ OR 姿勢 OR バランス OR ウォーキング OR 歩行 OR 機能的回復 OR リラクセーション OR 静的姿勢 OR 窮屈な姿勢 OR 動的姿勢 OR 静的労働 OR 動的負荷 OR 持ちあげ OR 運搬 OR 抱え込み OR 引き OR 引きずり OR 押し OR 手作業 OR 力 OR 生物力学 OR ウォーキング OR 歩行 OR 姿勢 OR バランス OR 屈曲 OR 伸長 OR 拡張 OR 回転 OR 座位 OR 座り OR 膝曲げ OR スクワット OR より合わせ OR 曲げ OR 伸ばし OR 立位 OR 座位 OR 反復運動 OR 単調動作 OR 単調な仕事 OR リラクセーション OR 機能的回復 OR 身体的負荷 OR 身体的 OR 負荷) OR (心理的ストレス OR ソーシャル・サポート OR 仕事の満足度 OR 仕事のストレス耐性 OR 従業員のパフォーマンス評価 OR 従業員の抗議 OR (社会的正義 AND 心理学) OR 人員削減 OR 従業員教育 OR 組織文化 OR いじめ OR 偏見 OR 社会的差別 OR 対人関係 OR (コミュニケーション AND 心理学)) OR (心理社会的 OR 仕事のストレイン OR 仕事のストレス OR 仕事の要求度 OR 高い要求度 OR 低いコ

---

---

ントロール OR コントロールの欠如 OR 仕事のコントロール OR 裁量の範囲 OR 仕事の影響 OR 要求度資源 OR 努力報酬 OR 時間的切迫 OR 病気からの回復 OR 療養 OR 仕事の負担 OR 回復 OR コーピング OR 対処 OR 職務能力 OR 社会的支援 OR ソーシャルサポート OR 支援システム OR サポートシステム OR 社会的ネットワーク OR ソーシャルネットワーク OR ソーシャルキャピタル OR 情緒的支援 OR 情緒的サポート OR 対人関係 OR 人間関係 OR 対人交流 OR 相互作用 OR 公正 OR 不公正 OR 職務満足感 OR 退屈 OR 技能の幅 OR 職員研修 OR 差別 OR 嫌がらせ OR 職場の葛藤 OR 職場の暴力 OR いじめ OR 年齢差別 OR 同性愛差別 OR 人種差別 OR 性差別 OR 虐待 OR 静かな職場 OR 役割曖昧さ OR 役割葛藤 OR 仕事での役割 OR 労働時間 OR 勤務時間 OR 日中 OR 夜間 OR シフト業務 OR 交代勤務 OR 時間差勤務 OR 臨時業務 OR フルタイム OR パートタイム OR フレックス制度 OR 組織改革 OR 組織再編 OR リーン生産 OR トヨタ生産方式 OR 安定雇用 OR 不安定雇用) AND  
(炎症 OR 免疫 OR C反応性 OR CRP OR サイトカイン OR リンホカイン OR ケモカイン OR モノカイン OR 腫瘍壊死性因子 OR TNF OR インターロイキン OR IL) AND  
(縦断研究 OR 前向きコホート研究 OR 前向き研究 OR 追跡研究 OR フォローアップ研究 OR 観察研究 OR 症例対照研究 OR 疫学研究 OR 後向き研究)

---
