# Supplementary material for: Psychosocial factors at work and inflammatory markers: protocol for a systematic review and meta-analysis
Source: PubMed Central journal article supplement — BMJ Open. 2018 Aug 29;8(8):e022612. doi: 10.1136/bmjopen-2018-022612 (PMC6119426; doi:10.1136/bmjopen-2018-022612), 2018-08-29
Supplement: bmjopen-2018-022612supp002.pdf [file bmjopen-2018-022612supp002.pdf]

## Appendix 2. Standardized form to assess eligibility for inclusion

| ID | Database | No | Title                                                                                              | Author name                                              | Source                                                                                                       | Abstract                                                                                                                                                                                                                                                                                                                                                                                                                                                                                                                                                                                                                                                                                                                                                                                                                                                                                                                                                                                                                                                                                                                                                                                                                                                                                                                                                                                                                                                                                                                                                  | URL | reviewer 1 | reviewer 2 | Result_ screening 1 | Result_ screening 2 | Result_ discussion |
|----|----------|----|----------------------------------------------------------------------------------------------------|----------------------------------------------------------|--------------------------------------------------------------------------------------------------------------|-----------------------------------------------------------------------------------------------------------------------------------------------------------------------------------------------------------------------------------------------------------------------------------------------------------------------------------------------------------------------------------------------------------------------------------------------------------------------------------------------------------------------------------------------------------------------------------------------------------------------------------------------------------------------------------------------------------------------------------------------------------------------------------------------------------------------------------------------------------------------------------------------------------------------------------------------------------------------------------------------------------------------------------------------------------------------------------------------------------------------------------------------------------------------------------------------------------------------------------------------------------------------------------------------------------------------------------------------------------------------------------------------------------------------------------------------------------------------------------------------------------------------------------------------------------|-----|------------|------------|---------------------|---------------------|--------------------|
| 1  | Embase   | 1  | Effect of breastfeeding on postpartum depressive symptoms among adolescent and young adult mothers | Sispa H.L., Ruiz E., Jones K., Magriples U., Kershaw T., | Journal of Maternal-Fetal and Neonatal Medicine (2018) 31:11 (1442-1447).<br>Date of Publication: 3 Jun 2018 | <p>Purpose: To describe the association between breastfeeding and postpartum depressive symptoms among a sample of adolescent and young adult mothers and to determine whether breastfeeding difficulty moderates this association. Materials and methods: Data were derived from a prospective cohort of pregnant adolescent and young adult females (ages 14-21) as they transitioned to parenthood. This analysis uses data collected during pregnancy and at 6 months postpartum among mothers (n = 137) who initiated breastfeeding. Multivariable linear regression was used to adjust for prenatal depressive symptoms and other potential confounders. Results: Postpartum depressive symptoms were not significantly associated with breastfeeding duration or breastfeeding at 6 months. Early breastfeeding difficulty moderated the association between depressive symptoms and breastfeeding at 6 months. Among young mothers who were still breastfeeding at 6 months, those who reported no early breastfeeding difficulties had the lowest depressive scores and those who reported much early breastfeeding difficulty had the highest depressive scores at 6 months. Conclusions: Minimizing challenges with breastfeeding may help improve postpartum mental health among adolescent and young adult mothers. Health care providers should help young pregnant women manage expectations about breastfeeding and ensure that they are linked to appropriate professional breastfeeding support during the early postpartum period.</p> |     | KW         | HE         | ○                   | ×                   | ×                  |
